# Supplementary material
Source: Springer Nature journal article supplement (https://www.springermedizin.de/resource/supplementary/12913_2014_3467_MOESM1_ESM.pdf/9532936)
Supplement: MOESM1 [file 9532936]

## Additional File 1: CORE-Q Consolidated Criteria for Reporting Qualitative Research

| No                                             | Item                                     | Description                                                                                                                                                                                   |
|------------------------------------------------|------------------------------------------|-----------------------------------------------------------------------------------------------------------------------------------------------------------------------------------------------|
| <b>Domain 1: Research Team and Reflexivity</b> |                                          |                                                                                                                                                                                               |
| <b>Personal Characteristics</b>                |                                          |                                                                                                                                                                                               |
| 1                                              | Interviewer / facilitator                | Ben Harris-Roxas                                                                                                                                                                              |
| 2                                              | Credentials                              | Bachelor of Social Work, Master of Policy and Applied Social Research, PhD (Public Health)                                                                                                    |
| 3                                              | Occupation                               | Research and evaluation consultant, Conjoint Lecturer at the University of New South Wales                                                                                                    |
| 4                                              | Gender                                   | Male                                                                                                                                                                                          |
| 5                                              | Experience and Training                  | Has undertaken several qualitative studies, trained in interviewing, qualitative analysis and using NVivo                                                                                     |
| <b>Relationship with participants</b>          |                                          |                                                                                                                                                                                               |
| 6                                              | Relationship established                 | A relationship existed with 10 of the 14 interviewees prior to the interviews                                                                                                                 |
| 7                                              | Participant knowledge of the interviewer | Knew the researcher has worked on HIA and health equity for several years, the interviewer had contact with 10 of the 14 people interviewed through other activities than the EFHIA described |
| 8                                              | Interviewer characteristics              | Is doing a PhD on EFHIA in health service planning                                                                                                                                            |
| <b>Domain 2: Study Design</b>                  |                                          |                                                                                                                                                                                               |

| <b>Theoretical Framework</b> |                                       |                                                                                                                                                                                            |
|------------------------------|---------------------------------------|--------------------------------------------------------------------------------------------------------------------------------------------------------------------------------------------|
| 9                            | Methodological orientation and theory | Interpretive description, case study methodology                                                                                                                                           |
| <b>Participant Selection</b> |                                       |                                                                                                                                                                                            |
| 10                           | Sampling                              | Purposive                                                                                                                                                                                  |
| 11                           | Method of approach                    | Emails (11 of 14) and phone calls (3 of 14)                                                                                                                                                |
| 12                           | Sample size                           | 14                                                                                                                                                                                         |
| 13                           | Non participation                     | No potential participants declined                                                                                                                                                         |
| <b>Setting</b>               |                                       |                                                                                                                                                                                            |
| 14                           | Setting of data collection            | Participants' workplaces, in person or on telephone                                                                                                                                        |
| 15                           | Presence of non-participants          | No                                                                                                                                                                                         |
| 16                           | Description of sample                 | A mix of those who developed the health service plan, those who conducted the EFHIA and those who were responsible for implementing its recommendations in each of the three case studies. |
| <b>Data Collection</b>       |                                       |                                                                                                                                                                                            |
| 17                           | Interview guide                       | Provided in advance (see Table 2), piloted on 2 brief interviews not included in study                                                                                                     |
| 18                           | Repeat interviews                     | No                                                                                                                                                                                         |
| 19                           | Audio/visual recording                | Audio                                                                                                                                                                                      |

|    |                      |                                                                                                                                              |
|----|----------------------|----------------------------------------------------------------------------------------------------------------------------------------------|
| 20 | Field notes          | No                                                                                                                                           |
| 21 | Duration             | Mean 22 minutes, Range 16 minutes (min) to 40 minutes (max)                                                                                  |
| 22 | Data saturation      | Yes, saturation across and within case studies was discussed by BHR and LK and by 14 interviews new categories and themes were not emerging. |
| 23 | Transcripts returned | No                                                                                                                                           |

### Domain 3: Analysis and Findings

#### Data Analysis

|    |                                |                                                                                                                                                                                                                                                                                                                                                                                                                                                                                                                                                                  |
|----|--------------------------------|------------------------------------------------------------------------------------------------------------------------------------------------------------------------------------------------------------------------------------------------------------------------------------------------------------------------------------------------------------------------------------------------------------------------------------------------------------------------------------------------------------------------------------------------------------------|
| 24 | Number of data coders          | Initial coding was done by BHR making two coding passes of all data. The first pass of all interviews coded against the existing conceptual framework, the second pass was free coded to identify different or emergent themes or items. The four longest interviews were also coded by FH, as someone with expertise in HIA, and Mark Harris, as someone with expertise in primary health care and service planning but not HIA, to ensure compatibility and soundness of coding and that there were no additional themes that had not already been identified. |
| 25 | Description of the coding tree | Yes, see Additional file 3                                                                                                                                                                                                                                                                                                                                                                                                                                                                                                                                       |
| 26 | Derivation of themes           | Themes were derived from an existing conceptual framework and also through open coding of interview transcripts and documents                                                                                                                                                                                                                                                                                                                                                                                                                                    |

---

|    |          |       |
|----|----------|-------|
| 27 | Software | NVivo |
|----|----------|-------|

---

|    |                      |    |
|----|----------------------|----|
| 28 | Participant checking | No |
|----|----------------------|----|

---

|                  |  |  |
|------------------|--|--|
| <b>Reporting</b> |  |  |
|------------------|--|--|

---

|    |                      |                                                  |
|----|----------------------|--------------------------------------------------|
| 29 | Quotations presented | Yes, selectively to illustrate analytic findings |
|----|----------------------|--------------------------------------------------|

---

|    |                              |     |
|----|------------------------------|-----|
| 30 | Data and findings consistent | Yes |
|----|------------------------------|-----|

---

|    |                         |     |
|----|-------------------------|-----|
| 31 | Clarity of major themes | Yes |
|----|-------------------------|-----|

---

|    |                         |                                                                                                  |
|----|-------------------------|--------------------------------------------------------------------------------------------------|
| 32 | Clarity of minor themes | No, the focus is on major analytic findings and higher-order changes to the conceptual framework |
|----|-------------------------|--------------------------------------------------------------------------------------------------|

---
